# Supplementary material for: Gas-phase loading of [Zn4O(btb)2] (MOF-177) with organometallic CVD-precursors: inclusion compounds of the type [LnM]a@MOF-177 and the formation of Cu and Pd nanoparticles inside MOF-177
Source: Royal Society of Chemistry journal article supplement (doi:10.1039/b810989c), 2008-01-01
Supplement: b810989c.pdf [file b810989c.pdf]

## Supporting Information to

### Gas-Phase Loading of $[\text{Zn}_4\text{O}(\text{btb})_2]$ (MOF-177) with Organometallic CVD-Precursors: Inclusion Compounds of the Type $[\text{L}_n\text{M}]_a@$ MOF-177 and the Formation of Cu and Pd Nanoparticles inside MOF-177.

Maïke Müller, Oleg Lebedev and Roland A. Fischer

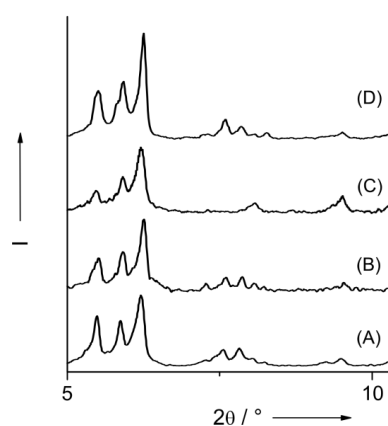

**Figure S1** The diffractogramme shows a change in the intensities of the first three reflexes, in comparison between the unloaded and evacuated MOF-177 material and the precursor@MOF-177 material. This is due to the inclusion of guest molecules and can be observed for as-synthesized and fully evacuated MOF-177 material as well.

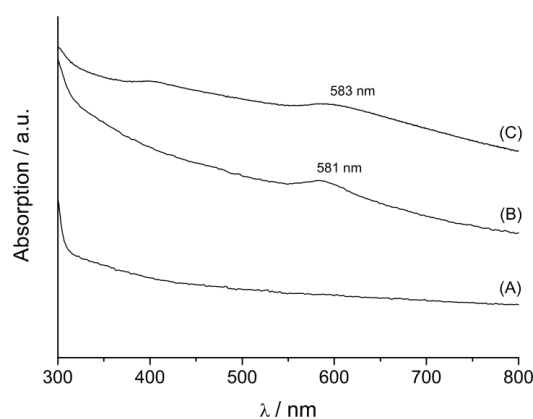

**Figure S2** UV/VIS spectra of (A) MOF-177, (B) Cu@MOF-177 derived from  $[\text{Cu}(\eta^5\text{-C}_5\text{H}_5)(\text{CN}^t\text{Bu})_2]@$ MOF-177 and (C) Cu@MOF-177 derived from  $[\text{Cu}(\eta^5\text{-C}_5\text{H}_5)(\text{P}(\text{CH}_3)_3)_2]@$ MOF-177. The spectra shows a broad absorption band, which proves the presence of copper. It clearly indicates the existence of small copper particles due to the typical copper plasmon resonance feature.

Supplementary Material (ESI) for Journal of Materials Chemistry

This journal is © The Royal Society of Chemistry 2008
